# Supplementary material
Source: Springer Nature journal article supplement (https://www.springermedizin.de/resource/supplementary/12998_2009_105_MOESM4_ESM.pdf/9623626)
Supplement: MOESM4 [file 9623626]

| <b>Musculoskeletal</b>                                                                                                                                                                                                                                                                                                                                                                                                                                                                                                       | <b>Headache</b>                                                                                                                                                       | <b>Non-Musculoskeletal</b>                                                                                                                                                                                                                                                                                   |
|------------------------------------------------------------------------------------------------------------------------------------------------------------------------------------------------------------------------------------------------------------------------------------------------------------------------------------------------------------------------------------------------------------------------------------------------------------------------------------------------------------------------------|-----------------------------------------------------------------------------------------------------------------------------------------------------------------------|--------------------------------------------------------------------------------------------------------------------------------------------------------------------------------------------------------------------------------------------------------------------------------------------------------------|
| <ul style="list-style-type: none"><li>● <b>Spinal pain</b><ul style="list-style-type: none"><li>○ low back</li><li>○ thoracic</li><li>○ neck</li><li>○ coccyx</li></ul></li><li>● <b>Extremity pain</b><ul style="list-style-type: none"><li>○ shoulder</li><li>○ elbow</li><li>○ wrist</li><li>○ hip</li><li>○ knee</li><li>○ foot/ankle</li></ul></li><li>● <b>Other</b><ul style="list-style-type: none"><li>○ temporo-mandibular disorders</li><li>○ fibromyalgia</li><li>○ myofascial pain syndrome</li></ul></li></ul> | <ul style="list-style-type: none"><li>● <b>migraine</b></li><li>● <b>tension type</b></li><li>● <b>cervicogenic</b></li><li>● <b>miscellaneous headache</b></li></ul> | <ul style="list-style-type: none"><li>● <b>asthma</b></li><li>● <b>pneumonia</b></li><li>● <b>vertigo</b></li><li>● <b>infant colic</b></li><li>● <b>hypertension</b></li><li>● <b>enuresis</b></li><li>● <b>dysmenorrhea</b></li><li>● <b>premenstrual syndrome</b></li><li>● <b>otitis media</b></li></ul> |
